# Supplementary material for: Gene therapy via canalostomy approach preserves auditory and vestibular functions in a mouse model of Jervell and Lange-Nielsen syndrome type 2
Source: PubMed Central journal article supplement (PMC7846845; doi:10.1038/s41467-020-20808-7), 2021-01-29
Supplement: 41467_2020_20808_MOESM10_ESM.pdf [file 41467_2020_20808_MOESM10_ESM.pdf]

**Title:** Supplementary Video 1:

**Description:** A demonstration showing surgical procedure for inner ear gene therapy via canalostomy approach in a neonatal Kcne1<sup>-/-</sup> mouse.

**Title:** Supplementary Video 2:

**Description:** Circling behavior and demonstration of test for an untreated Kcne1<sup>-/-</sup> mouse at P30.

**Title:** Supplementary Video 3:

**Description:** Circling test in a Kcne1<sup>-/-</sup> mouse from the high-dose-treated group tested at P30.

**Title:** Supplementary Video 4:

**Description:** Circling test showing a Kcne1 WT mouse examined at P30.

**Title:** Supplementary Video 5:

**Description:** Swimming test in a Kcne1 WT mouse examined at P30.

**Title:** Supplementary Video 6:

**Description:** Swimming test in an untreated Kcne1<sup>-/-</sup> mouse examined at P30.

**Title:** Supplementary Video 7:

**Description:** Swimming test in a high-dose-treated Kcne1<sup>-/-</sup> mouse examined at P30.
